# Supplementary material for: Screening of Particulate Matter Reduction Ability of 21 Indigenous Korean Evergreen Species for Indoor Use
Source: MDPI journal article supplement (doi:10.3390/ijerph18189803), 2021-09-17
Supplement: s1 [file s1]

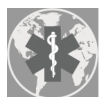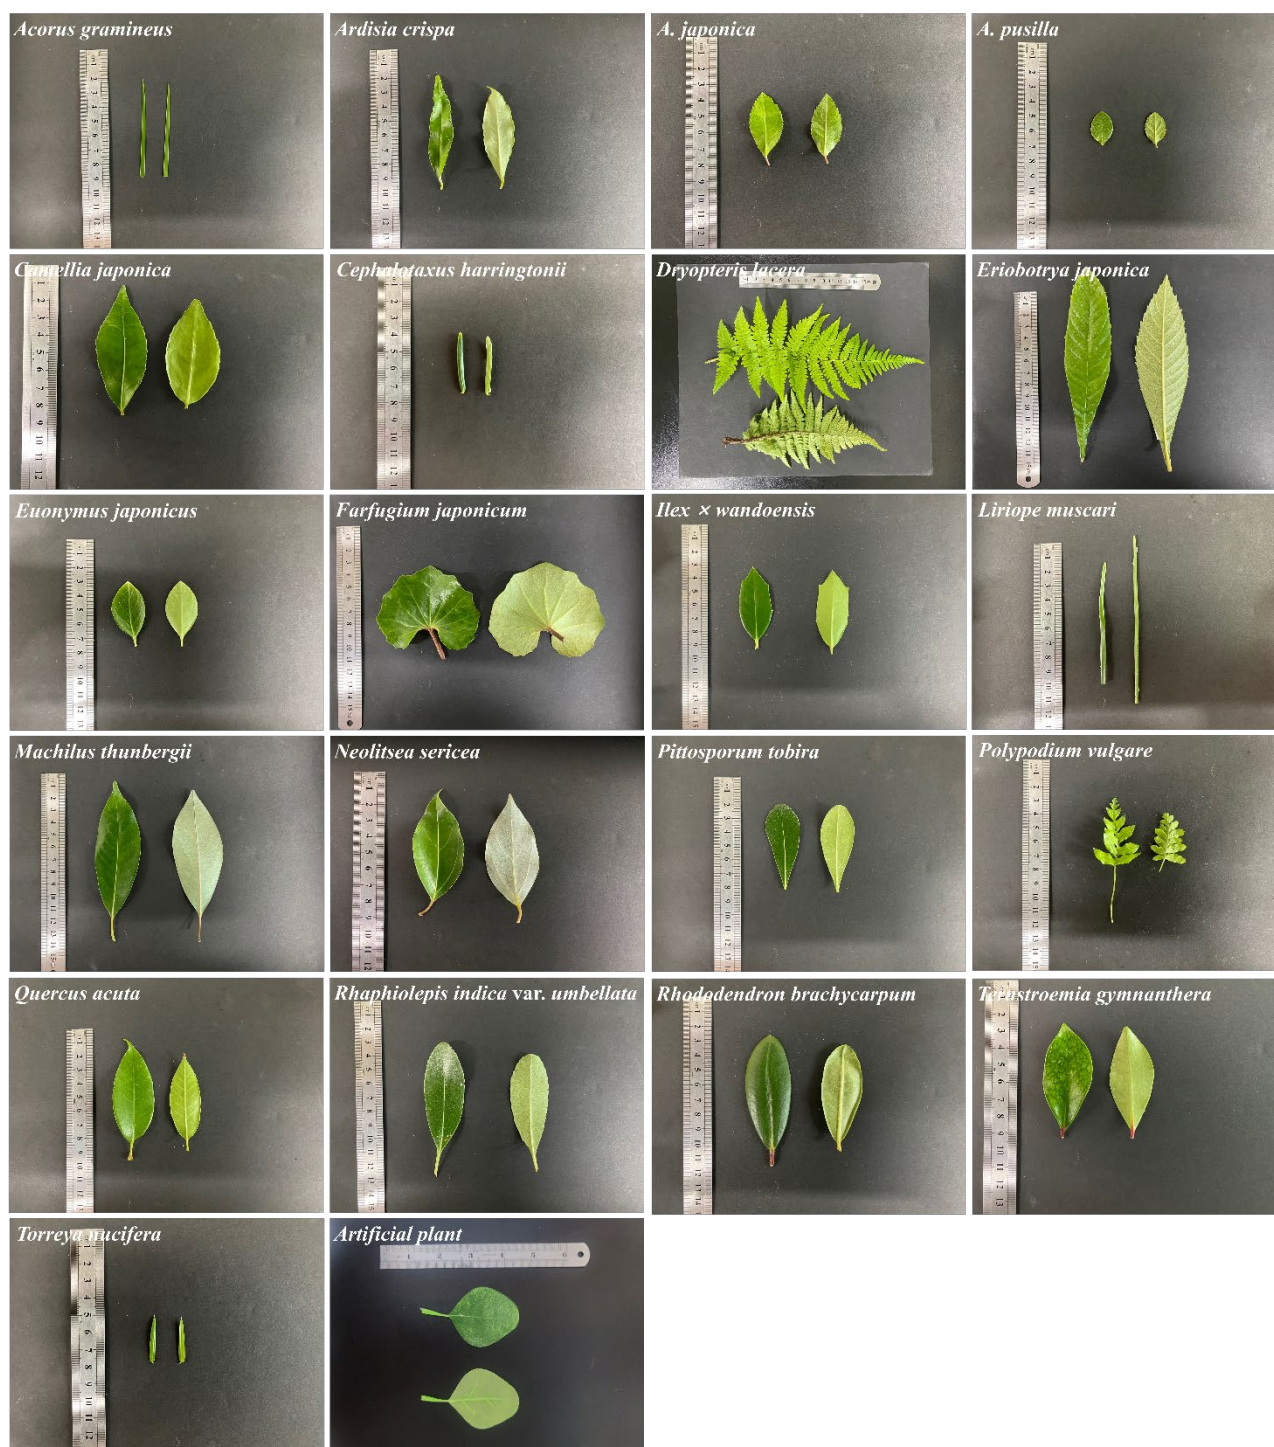

**Figure S1.** Leaf shape of plant species and artificial plant used in this study.

**Table S1.** Effect of light intensity on the growth parameters of 19 plant species.

| Species                          | Light intensity (PPFD) | Plant height (cm)          | Leaf number (ea/plant) | Leaf length (cm) | Leaf width (cm) | Chlorophyll content |
|----------------------------------|------------------------|----------------------------|------------------------|------------------|-----------------|---------------------|
| <i>Ilex × wandoensis</i>         | Control <sup>1</sup>   | 21.2 ± 1.76 a <sup>2</sup> | 41.3 ± 6.64 a          | 6.8 ± 0.80 a     | 3.5 ± 0.13 a    | 47.7 ± 3.92 c       |
|                                  | 10                     | 21.4 ± 1.97 a              | 24.8 ± 1.49 b          | 7.3 ± 0.41 a     | 3.3 ± 0.10 a    | 70.9 ± 2.91 a       |
|                                  | 50                     | 22.9 ± 1.04 a              | 26.5 ± 2.25 b          | 6.0 ± 0.39 a     | 3.2 ± 0.24 a    | 63.6 ± 0.35 b       |
|                                  | 100                    | 20.0 ± 1.04 a              | 29.3 ± 2.87 b          | 7.4 ± 0.51 a     | 3.4 ± 0.37 a    | 60.1 ± 1.26 b       |
|                                  | 200                    | 20.1 ± 1.09 a              | 27.5 ± 3.52 b          | 6.5 ± 0.30 a     | 3.2 ± 0.32 a    | 63.2 ± 1.96 b       |
| <i>Euonymus japonicus</i>        | Control                | 40.0 ± 2.49 b              | 160.7 ± 19.23 a        | 4.8 ± 0.22 b     | 2.7 ± 0.13 ab   | 69.4 ± 0.88 a       |
|                                  | 10                     | 48.3 ± 2.83 ab             | 187.3 ± 4.26 a         | 4.8 ± 0.23 b     | 2.1 ± 0.12 b    | 74.4 ± 0.96 a       |
|                                  | 50                     | 46.3 ± 4.15 ab             | 184.0 ± 7.23 a         | 4.8 ± 0.06 b     | 2.3 ± 0.10 b    | 71.6 ± 2.10 a       |
|                                  | 100                    | 50.0 ± 3.48 a              | 187.8 ± 5.65 a         | 4.7 ± 0.26 b     | 2.3 ± 0.14 b    | 62.6 ± 2.26 b       |
|                                  | 200                    | 53.9 ± 1.18 a              | 223.8 ± 8.43 a         | 5.5 ± 0.08 a     | 3.3 ± 0.63 a    | 59.7 ± 2.30 b       |
| <i>Cephalotaxus harringtonii</i> | Control                | 19.9 ± 1.30 a              | 252.2 ± 15.78 a        | 2.6 ± 0.03 ab    | 0.3 ± 0.01 bc   | 60.3 ± 3.73 a       |
|                                  | 10                     | 22.8 ± 0.79 a              | 153.7 ± 15.03 c        | 2.7 ± 0.09 ab    | 0.3 ± 0.02 a    | 61.2 ± 1.82 a       |
|                                  | 50                     | 22.0 ± 0.80 a              | 219.2 ± 13.18 ab       | 2.5 ± 0.20 b     | 0.3 ± 0.00 ab   | 64.3 ± 2.84 a       |
|                                  | 100                    | 21.2 ± 1.21 a              | 202.6 ± 13.60 b        | 2.9 ± 0.12 a     | 0.3 ± 0.00 ab   | 65.1 ± 4.22 a       |
|                                  | 200                    | 21.6 ± 1.11 a              | 230.3 ± 11.90 ab       | 2.5 ± 0.09 b     | 0.2 ± 0.02 c    | 70.5 ± 3.65 a       |
| <i>Rhododendron brachycarpum</i> | Control                | 23.0 ± 1.29 a              | 33.3 ± 4.98 c          | 13.4 ± 1.08 a    | 4.6 ± 0.35 a    | 52.8 ± 4.25 a       |
|                                  | 10                     | 22.6 ± 0.93 a              | 58.0 ± 2.65 b          | 9.0 ± 0.85 b     | 2.8 ± 0.06 b    | 45.5 ± 3.72 a       |
|                                  | 50                     | 23.6 ± 0.13 a              | 68.0 ± 7.00 b          | 8.8 ± 0.76 b     | 2.9 ± 0.09 b    | 52.1 ± 2.35 a       |
|                                  | 100                    | 23.1 ± 0.86 a              | 66.7 ± 3.84 b          | 8.5 ± 0.55 b     | 3.2 ± 0.12 b    | 49.5 ± 3.24 a       |
|                                  | 200                    | 20.7 ± 1.95 a              | 83.0 ± 4.58 a          | 8.8 ± 0.75 b     | 2.9 ± 0.25 b    | 52.3 ± 7.70 a       |
| <i>Quercus acuta</i>             | Control                | 30.4 ± 1.53 a              | 22.5 ± 2.97 a          | 9.0 ± 0.18 a     | 3.1 ± 0.13 a    | 37.0 ± 2.49 b       |
|                                  | 10                     | 22.0 ± 1.25 b              | 18.0 ± 1.08 a          | 8.6 ± 0.53 a     | 2.6 ± 0.19 b    | 42.6 ± 2.74 a       |
|                                  | 50                     | 23.3 ± 0.86 b              | 17.0 ± 0.58 a          | 8.7 ± 0.51 a     | 2.4 ± 0.12 b    | 42.4 ± 1.26 a       |
|                                  | 100                    | 24.0 ± 0.40 b              | 19.3 ± 1.86 a          | 8.7 ± 0.28 a     | 2.7 ± 0.06 b    | 35.6 ± 1.18 b       |
|                                  | 200                    | 24.1 ± 1.62 b              | 22.7 ± 3.18 a          | 8.7 ± 0.06 a     | 2.6 ± 0.19 b    | 34.0 ± 0.94 b       |
| <i>Neolitsea sericea</i>         | Control                | 37.8 ± 0.86 a              | 22.8 ± 2.02 a          | 10.1 ± 0.19 a    | 3.6 ± 0.09 b    | 36.6 ± 0.84 cd      |
|                                  | 10                     | 33.4 ± 2.32 b              | 25.0 ± 2.08 a          | 11.4 ± 0.77 a    | 4.2 ± 0.18 ab   | 46.7 ± 0.42 a       |
|                                  | 50                     | 39.1 ± 2.28 a              | 25.0 ± 1.68 a          | 11.3 ± 0.21 a    | 4.3 ± 0.28 a    | 43.4 ± 0.98 b       |
|                                  | 100                    | 38.3 ± 1.02 a              | 23.5 ± 1.19 a          | 11.3 ± 0.46 a    | 4.3 ± 0.16 ab   | 39.3 ± 0.91 c       |
|                                  | 200                    | 39.3 ± 1.13 a              | 24.5 ± 1.04 a          | 11.5 ± 0.14 a    | 4.0 ± 0.28 ab   | 34.7 ± 1.01 d       |
| <i>Machilus thunbergii</i>       | Control                | 36.7 ± 1.48 a              | 30.5 ± 3.92 a          | 9.8 ± 0.16 ab    | 3.6 ± 0.23 ab   | 33.0 ± 0.97 d       |
|                                  | 10                     | 29.1 ± 2.32 b              | 16.3 ± 1.44 b          | 9.9 ± 0.78 ab    | 4.3 ± 0.55 a    | 49.9 ± 1.22 ab      |
|                                  | 50                     | 27.6 ± 1.14 b              | 26.7 ± 2.96 ab         | 10.7 ± 0.56 a    | 4.0 ± 0.27 ab   | 52.4 ± 1.92 a       |
|                                  | 100                    | 29.2 ± 0.80 b              | 25.7 ± 0.88 ab         | 10.7 ± 0.22 a    | 4.0 ± 0.23 ab   | 47.2 ± 0.85 b       |
|                                  | 200                    | 25.7 ± 1.59 b              | 31.0 ± 5.82 a          | 9.0 ± 0.15 b     | 3.2 ± 0.21 b    | 39.7 ± 1.26 c       |
| <i>Ardisia crispa</i>            | Control                | 20.4 ± 0.53 ab             | 20.3 ± 5.21 a          | 9.0 ± 0.43 a     | 2.6 ± 0.10 a    | 41.7 ± 2.79 a-c     |
|                                  | 10                     | 20.8 ± 1.31 ab             | 6.3 ± 0.63 b           | 8.7 ± 0.74 a     | 3.2 ± 0.31 a    | 55.2 ± 6.21 a       |
|                                  | 50                     | 19.6 ± 2.78 b              | 10.0 ± 2.04 b          | 8.2 ± 0.20 a     | 2.8 ± 0.24 a    | 45.6 ± 5.41 ab      |
|                                  | 100                    | 21.8 ± 1.61 ab             | 13.0 ± 2.74 ab         | 9.4 ± 0.52 a     | 2.8 ± 0.09 a    | 32.7 ± 0.94 bc      |

|                                                 |         |                            |                   |                |                |                |
|-------------------------------------------------|---------|----------------------------|-------------------|----------------|----------------|----------------|
|                                                 | 200     | 26.8 ± 2.63 a              | 11.3 ± 2.36 b     | 8.0 ± 0.42 a   | 2.6 ± 0.04 a   | 30.0 ± 2.61 c  |
| <i>A. pusilla</i>                               | Control | 7.0 ± 0.09 a               | 16.3 ± 2.91 b     | 3.4 ± 0.10 ab  | 2.4 ± 0.23 a   | 44.3 ± 2.37 ab |
|                                                 | 10      | 8.1 ± 0.56 a               | 20.3 ± 2.58 ab    | 3.6 ± 0.29 ab  | 2.4 ± 0.08 a   | 45.3 ± 1.03 ab |
|                                                 | 50      | 8.3 ± 1.33 a               | 27.5 ± 4.93 a     | 3.8 ± 0.26 a   | 2.5 ± 0.13 a   | 48.6 ± 2.52 ab |
|                                                 | 100     | 9.8 ± 1.75 a               | 28.2 ± 3.22 a     | 3.5 ± 0.23 ab  | 2.4 ± 0.08 a   | 52.1 ± 3.15 a  |
|                                                 | 200     | 8.7 ± 1.06 a               | 19.3 ± 1.17 ab    | 2.9 ± 0.22 b   | 2.7 ± 0.18 a   | 41.3 ± 2.70 b  |
| <i>A. japonica</i>                              | Control | 12.2 ± 1.39 a              | 2.7 ± 0.67 a      | 5.7 ± 0.39 b   | 2.5 ± 0.17 a   | 38.2 ± 2.23 a  |
|                                                 | 10      | 14.9 ± 2.00 a              | 6.5 ± 2.18 a      | 7.3 ± 0.61 ab  | 3.2 ± 0.29 a   | 39.5 ± 1.78 a  |
|                                                 | 50      | 12.6 ± 1.23 a              | 7.3 ± 1.75 a      | 7.9 ± 0.25 a   | 3.5 ± 0.31 a   | 39.1 ± 0.74 a  |
|                                                 | 100     | 14.9 ± 0.70 a              | 6.7 ± 0.33 a      | 6.8 ± 0.34 ab  | 3.1 ± 0.06 a   | 38.9 ± 2.98 a  |
|                                                 | 200     | 13.1 ± 2.44 a              | 6.8 ± 1.89 a      | 6.8 ± 0.64 ab  | 3.0 ± 0.44 a   | 36.3 ± 2.61 a  |
| <i>Pittosporum tobira</i>                       | Control | 35.3 ± 3.64 a <sup>y</sup> | 57.2 ± 6.73 a     | 5.6 ± 0.32 b   | 2.3 ± 0.11 ab  | 44.0 ± 1.49 b  |
|                                                 | 10      | 31.4 ± 2.25 a              | 58.7 ± 6.74 a     | 6.7 ± 0.32 a   | 2.5 ± 0.23 ab  | 53.4 ± 2.40 a  |
|                                                 | 50      | 33.4 ± 1.48 a              | 52.0 ± 1.53 a     | 6.8 ± 0.27 a   | 2.7 ± 0.03 a   | 57.5 ± 2.34 a  |
|                                                 | 100     | 36.9 ± 1.27 a              | 51.5 ± 6.25 a     | 7.0 ± 0.42 a   | 2.5 ± 0.14 ab  | 52.9 ± 3.54 a  |
|                                                 | 200     | 35.7 ± 1.33 a              | 53.3 ± 4.27 a     | 6.4 ± 0.18 ab  | 2.2 ± 0.10 b   | 53.5 ± 2.90 a  |
| <i>Raphiolepis indica</i> var. <i>umbellata</i> | Control | 40.1 ± 1.29 a              | 49.8 ± 4.11 b     | 9.5 ± 0.48 a   | 2.6 ± 0.16 a   | 46.8 ± 1.36 c  |
|                                                 | 10      | 37.6 ± 1.90 a              | 47.0 ± 5.90 b     | 7.0 ± 0.32 b   | 2.3 ± 0.05 a   | 65.0 ± 1.15 a  |
|                                                 | 50      | 38.3 ± 2.95 a              | 49.3 ± 5.85 b     | 8.0 ± 0.16 b   | 2.7 ± 0.18 a   | 69.1 ± 0.82 a  |
|                                                 | 100     | 43.7 ± 2.52 a              | 69.5 ± 3.07 a     | 8.0 ± 0.31 b   | 2.5 ± 0.15 a   | 54.0 ± 0.55 b  |
|                                                 | 200     | 43.5 ± 4.78 a              | 65.8 ± 4.82 a     | 8.1 ± 0.26 b   | 2.7 ± 0.13 a   | 56.0 ± 4.11 b  |
| <i>Eriobotrya japonica</i>                      | Control | 38.3 ± 1.96 a <sup>x</sup> | 17.3 ± 2.02 a     | 12.2 ± 0.29 b  | 4.1 ± 0.12 b   | 44.6 ± 1.41 c  |
|                                                 | 10      | 32.8 ± 0.74 a              | 18.0 ± 1.35 a     | 14.7 ± 0.97 ab | 4.8 ± 0.21 ab  | 56.2 ± 0.88 b  |
|                                                 | 50      | 33.2 ± 2.39 a              | 17.8 ± 1.80 a     | 15.0 ± 1.27 ab | 5.5 ± 0.46 ab  | 55.4 ± 2.61 b  |
|                                                 | 100     | 38.2 ± 1.53 a              | 18.0 ± 0.58 a     | 16.2 ± 1.80 a  | 5.5 ± 0.71 ab  | 58.1 ± 2.29 b  |
|                                                 | 200     | 32.4 ± 2.10 a              | 18.0 ± 0.58 a     | 14.9 ± 1.29 ab | 5.5 ± 0.54 a   | 63.9 ± 0.90 a  |
| <i>Torreya nucifera</i>                         | Control | 33.9 ± 1.26 a <sup>y</sup> | 793.7 ± 57.15 a   | 2.6 ± 0.14 bc  | 0.3 ± 0.00 a   | 63.2 ± 2.76 b  |
|                                                 | 10      | 25.8 ± 1.46 b              | 715.5 ± 127.84 a  | 2.5 ± 0.11 c   | 0.3 ± 0.00 a   | 73.2 ± 2.28 a  |
|                                                 | 50      | 32.8 ± 1.82 a              | 1125.0 ± 71.47 a  | 2.7 ± 0.18 ab  | 0.3 ± 0.04 a   | 71.9 ± 2.62 a  |
|                                                 | 100     | 32.3 ± 0.24 a              | 1304.3 ± 170.83 a | 2.7 ± 0.15 a   | 0.4 ± 0.03 a   | 72.9 ± 2.26 a  |
|                                                 | 200     | 33.6 ± 1.31 a              | 1064.0 ± 122.83 a | 2.4 ± 0.22 ab  | 0.3 ± 0.04 a   | 68.1 ± 3.30 ab |
| <i>Camellia japonica</i>                        | Control | 33.3 ± 1.60 a              | 27.5 ± 2.11 a     | 7.3 ± 0.28 a   | 3.7 ± 0.17 a   | 74.9 ± 1.90 a  |
|                                                 | 10      | 36.6 ± 3.43 a              | 25.8 ± 2.21 a     | 7.0 ± 0.54 a   | 4.0 ± 0.53 a   | 68.4 ± 5.89 a  |
|                                                 | 50      | 36.9 ± 2.13 a              | 19.8 ± 1.49 a     | 7.8 ± 1.07 a   | 4.2 ± 0.31 a   | 70.5 ± 5.28 a  |
|                                                 | 100     | 41.6 ± 3.16 a              | 21.5 ± 1.89 a     | 8.4 ± 0.21 a   | 4.3 ± 0.20 a   | 69.8 ± 3.94 a  |
|                                                 | 200     | 37.6 ± 3.22 a              | 24.8 ± 4.66 a     | 8.1 ± 0.42 a   | 4.1 ± 0.15 a   | 63.1 ± 5.09 a  |
| <i>Ternstroemia gymnanthera</i>                 | Control | 23.2 ± 1.12 b              | 28.7 ± 5.81 a     | 8.3 ± 0.25 a   | 3.6 ± 0.10 ab  | 40.7 ± 0.26 a  |
|                                                 | 10      | 33.3 ± 1.57 a              | 28.0 ± 7.81 a     | 7.7 ± 0.29 ab  | 3.8 ± 0.30 a   | 44.5 ± 3.96 a  |
|                                                 | 50      | 31.4 ± 3.33 a              | 36.0 ± 6.93 a     | 5.5 ± 0.85 c   | 2.4 ± 0.13 c   | 44.6 ± 6.81 a  |
|                                                 | 100     | 29.6 ± 3.47 ab             | 50.7 ± 4.06 a     | 6.1 ± 0.44 bc  | 2.8 ± 0.50 bc  | 41.6 ± 0.73 a  |
|                                                 | 200     | 32.2 ± 1.27 a              | 44.3 ± 8.35 a     | 5.8 ± 0.45 c   | 3.0 ± 0.12 a-c | 37.2 ± 5.27 a  |

|                            |         |               |                            |               |               |               |
|----------------------------|---------|---------------|----------------------------|---------------|---------------|---------------|
| <i>Farfugium japonicum</i> | Control | 22.9 ± 0.93 a | 6.0 ± 0.58 a               | 26.3 ± 2.25 a | 14.6 ± 0.32   | 45.2 ± 1.22 a |
|                            |         |               |                            |               | ab            |               |
|                            | 10      | 14.1 ± 0.83 b | 5.0 ± 0.00 a               | 20.7 ± 1.20 b | 13.5 ± 0.73 b | 44.1 ± 1.75 a |
|                            | 50      | 9.6 ± 1.51 c  | 6.0 ± 0.91 a               | 16.2 ± 0.39 c | 15.3 ± 0.33 a | 42.6 ± 0.49 a |
|                            | 100     | 8.8 ± 0.71 c  | 4.3 ± 0.25 a               | 15.2 ± 0.63 c | 14.2 ± 0.58   | 46.3 ± 0.73 a |
|                            |         |               |                            |               | ab            |               |
| <i>Acorus gramineus</i>    | 200     | 9.5 ± 0.93 c  | 5.7 ± 0.88 a               | 15.6 ± 0.44 c | 14.3 ± 0.43   | 43.1 ± 4.15 a |
|                            |         |               |                            |               | ab            |               |
|                            | Control | -             | 24.0 ± 4.93 a              | 28.6 ± 2.39 a | 0.7 ± 0.06 a  | 56.7 ± 3.46 a |
|                            | 10      | -             | 8.8 ± 1.16 c               | 22.6 ± 1.08 b | 0.6 ± 0.04 b  | 54.6 ± 2.83 a |
|                            | 50      | -             | 12.4 ± 0.81 bc             | 23.6 ± 0.96 b | 0.5 ± 0.02 b  | 55.6 ± 3.41 a |
|                            | 100     | -             | 16.2 ± 1.59 b              | 22.4 ± 0.75 b | 0.5 ± 0.03 b  | 64.1 ± 3.87 a |
| <i>Liriope muscari</i>     | 200     | -             | 11.2 ± 2.08 bc             | 24.8 ± 1.60   | 0.5 ± 0.04 b  | 60.5 ± 4.32 a |
|                            |         |               |                            | ab            |               |               |
|                            | Control | -             | 48.3 ± 6.84 a <sup>z</sup> | 32.4 ± 4.13 a | 0.5 ± 0.03 a  | 36.6 ± 0.60 b |
|                            | 10      | -             | 38.3 ± 1.03 a              | 36.1 ± 2.65 a | 0.7 ± 0.16 a  | 51.1 ± 1.86 a |
|                            | 50      | -             | 41.5 ± 3.71 a              | 33.0 ± 2.68 a | 0.4 ± 0.05 a  | 55.8 ± 3.84 a |
|                            | 100     | -             | 39.3 ± 2.33 a              | 34.4 ± 3.32 a | 0.4 ± 0.05 a  | 53.7 ± 2.92 a |
|                            | 200     | -             | 41.8 ± 4.05 a              | 34.5 ± 1.88 a | 0.5 ± 0.03 a  | 55.0 ± 0.71 a |

<sup>1</sup> Different letters indicate a significant difference using Duncan's multiple range test at  $P < 0.05$ . <sup>2</sup> Plants grown in a glass greenhouse.

**Table S2.** Effects of light intensity on chlorophyll fluorescence parameters of 19 plant species.

| Species                          | Light intensity (PPFD) | Fv/Fm                      | Pi_Abs          | ETo/RC         | DIo/RC         |
|----------------------------------|------------------------|----------------------------|-----------------|----------------|----------------|
| <i>Ilex × wandoensis</i>         | Control <sup>1</sup>   | 0.84 ± 0.01 a <sup>2</sup> | 7.21 ± 1.48 bc  | 0.65 ± 0.10 a  | 0.21 ± 0.04 a  |
|                                  | 10                     | 0.84 ± 0.00 a              | 8.57 ± 0.18 ab  | 0.74 ± 0.03 a  | 0.21 ± 0.01 a  |
|                                  | 50                     | 0.85 ± 0.00 a              | 12.03 ± 1.87 a  | 0.72 ± 0.03 a  | 0.18 ± 0.00 a  |
|                                  | 100                    | 0.83 ± 0.02 a              | 10.54 ± 1.04 ab | 0.68 ± 0.08 a  | 0.24 ± 0.08 a  |
|                                  | 200                    | 0.80 ± 0.02 a              | 4.10 ± 0.04 c   | 0.71 ± 0.05 a  | 0.30 ± 0.04 a  |
| <i>Euonymus japonicus</i>        | Control                | 0.73 ± 0.00 d              | 1.80 ± 0.10 b   | 0.92 ± 0.06 a  | 0.57 ± 0.02 a  |
|                                  | 10                     | 0.78 ± 0.00 a              | 3.13 ± 0.18 a   | 0.96 ± 0.03 a  | 0.42 ± 0.03 b  |
|                                  | 50                     | 0.77 ± 0.01 ab             | 2.24 ± 0.57 ab  | 0.90 ± 0.01 a  | 0.49 ± 0.05 ab |
|                                  | 100                    | 0.76 ± 0.00 bc             | 2.55 ± 0.29 ab  | 0.83 ± 0.03 ab | 0.45 ± 0.03 b  |
|                                  | 200                    | 0.74 ± 0.01 cd             | 1.99 ± 0.44 ab  | 0.75 ± 0.04 b  | 0.48 ± 0.02 ab |
| <i>Cephalotaxus harringtonii</i> | Control                | 0.58 ± 0.07 b              | 0.36 ± 0.28 b   | 0.57 ± 0.21 a  | 1.46 ± 0.44 a  |
|                                  | 10                     | 0.77 ± 0.01 a              | 1.99 ± 0.28 a   | 0.85 ± 0.03 a  | 0.47 ± 0.04 b  |
|                                  | 50                     | 0.77 ± 0.01 a              | 2.53 ± 0.71 a   | 0.83 ± 0.00 a  | 0.44 ± 0.05 b  |
|                                  | 100                    | 0.77 ± 0.00 a              | 2.28 ± 0.08 a   | 0.82 ± 0.03 a  | 0.44 ± 0.01 b  |
|                                  | 200                    | 0.75 ± 0.00 a              | 1.31 ± 0.26 ab  | 0.71 ± 0.02 a  | 0.51 ± 0.03 b  |
| <i>Rhododendron brachycarpum</i> | Control                | 0.84 ± 0.01 a              | 6.98 ± 2.64 a   | 0.64 ± 0.06 a  | 0.21 ± 0.05 b  |
|                                  | 10                     | 0.82 ± 0.00 a              | 6.31 ± 0.41 a   | 0.69 ± 0.06 a  | 0.23 ± 0.01 b  |
|                                  | 50                     | 0.82 ± 0.00 a              | 7.35 ± 0.48 a   | 0.71 ± 0.04 a  | 0.23 ± 0.02 b  |
|                                  | 100                    | 0.73 ± 0.05 b              | 0.69 ± 0.34 b   | 0.75 ± 0.06 a  | 0.55 ± 0.13 a  |
|                                  | 200                    | 0.75 ± 0.01 b              | 2.05 ± 0.28 b   | 0.76 ± 0.06 a  | 0.46 ± 0.05 a  |
| <i>Quercus acuta</i>             | Control                | 0.69 ± 0.01 b              | 0.87 ± 0.04 b   | 1.00 ± 0.07 a  | 0.88 ± 0.08 a  |
|                                  | 10                     | 0.77 ± 0.01 a              | 2.42 ± 0.57 a   | 0.90 ± 0.04 ab | 0.47 ± 0.05 b  |
|                                  | 50                     | 0.75 ± 0.01 a              | 1.47 ± 0.20 ab  | 0.92 ± 0.03 ab | 0.59 ± 0.06 ab |

|                                          |         |                |                 |                 |                |
|------------------------------------------|---------|----------------|-----------------|-----------------|----------------|
|                                          | 100     | 0.74 ± 0.01 a  | 1.41 ± 0.25 b   | 0.86 ± 0.03 ab  | 0.58 ± 0.04 ab |
|                                          | 200     | 0.69 ± 0.03 b  | 0.68 ± 0.16 b   | 0.76 ± 0.08 b   | 0.83 ± 0.18 a  |
| <i>Neolitsea sericea</i>                 | Control | 0.57 ± 0.09 b  | 0.35 ± 0.16 b   | 0.71 ± 0.13 a   | 1.92 ± 0.94 a  |
|                                          | 10      | 0.74 ± 0.01 a  | 1.63 ± 0.15 a   | 0.89 ± 0.05 a   | 0.57 ± 0.05 a  |
|                                          | 50      | 0.73 ± 0.01 a  | 1.35 ± 0.15 a   | 0.92 ± 0.04 a   | 0.63 ± 0.06 a  |
|                                          | 100     | 0.67 ± 0.03 ab | 0.62 ± 0.20 b   | 0.80 ± 0.04 a   | 0.92 ± 0.13 a  |
|                                          | 200     | 0.57 ± 0.03 b  | 0.17 ± 0.02 b   | 0.70 ± 0.07 a   | 1.65 ± 0.24 a  |
| <i>Machilus thunbergii</i>               | Control | 0.70 ± 0.03 ab | 1.50 ± 0.59 a-c | 1.03 ± 0.09 a   | 0.78 ± 0.14 a  |
|                                          | 10      | 0.76 ± 0.01 a  | 2.19 ± 0.35 ab  | 0.88 ± 0.29 a   | 0.49 ± 0.05 b  |
|                                          | 50      | 0.76 ± 0.00 a  | 2.29 ± 0.17 a   | 0.94 ± 0.01 a   | 0.50 ± 0.02 b  |
|                                          | 100     | 0.71 ± 0.00 ab | 1.11 ± 0.16 bc  | 0.88 ± 0.08 a   | 0.69 ± 0.02 ab |
|                                          | 200     | 0.67 ± 0.03 b  | 0.80 ± 0.17 c   | 0.84 ± 0.09 a   | 0.85 ± 0.11 a  |
| <i>Ardisia crispa</i>                    | Control | 0.83 ± 0.01 a  | 5.34 ± 0.01 a   | 0.64 ± 0.07 b   | 0.21 ± 0.01 b  |
|                                          | 10      | 0.82 ± 0.00 a  | 5.73 ± 0.13 a   | 0.94 ± 0.02 a   | 0.31 ± 0.00 b  |
|                                          | 50      | 0.82 ± 0.00 a  | 6.06 ± 0.36 a   | 0.89 ± 0.00 a   | 0.29 ± 0.00 b  |
|                                          | 100     | 0.81 ± 0.01 a  | 4.90 ± 1.07 a   | 0.91 ± 0.04 a   | 0.34 ± 0.04 ab |
|                                          | 200     | 0.77 ± 0.02 b  | 4.02 ± 0.27 a   | 0.95 ± 0.02 a   | 0.47 ± 0.09 a  |
| <i>A. pusilla</i>                        | Control | 0.81 ± 0.02 a  | 3.02 ± 0.84 ab  | 0.67 ± 0.07 b   | 0.31 ± 0.04 b  |
|                                          | 10      | 0.78 ± 0.00 ab | 2.49 ± 0.15 b   | 0.82 ± 0.01 a   | 0.40 ± 0.01 a  |
|                                          | 50      | 0.81 ± 0.00 a  | 4.33 ± 0.20 a   | 0.85 ± 0.02 a   | 0.31 ± 0.01 b  |
|                                          | 100     | 0.79 ± 0.00 ab | 3.02 ± 0.13 ab  | 0.90 ± 0.05 a   | 0.39 ± 0.01 a  |
|                                          | 200     | 0.78 ± 0.01 b  | 2.42 ± 0.17 b   | 0.86 ± 0.05 a   | 0.45 ± 0.03 a  |
| <i>A. japonica</i>                       | Control | 0.79 ± 0.04 a  | 4.74 ± 1.72 a   | 0.49 ± 0.08 d   | 0.31 ± 0.09 a  |
|                                          | 10      | 0.81 ± 0.00 a  | 5.00 ± 0.26 a   | 0.79 ± 0.01 bc  | 0.29 ± 0.00 a  |
|                                          | 50      | 0.79 ± 0.00 a  | 4.05 ± 0.37 a   | 0.87 ± 0.03 ab  | 0.36 ± 0.01 a  |
|                                          | 100     | 0.79 ± 0.00 a  | 3.88 ± 0.15 a   | 0.94 ± 0.02 a   | 0.39 ± 0.02 a  |
|                                          | 200     | 0.81 ± 0.00 a  | 4.98 ± 0.72 a   | 0.72 ± 0.05 c   | 0.28 ± 0.01 a  |
| <i>Pittosporum tobira</i>                | Control | 0.66 ± 0.00 a  | 0.40 ± 0.07 b   | 0.71 ± 0.07 a   | 0.99 ± 0.02 b  |
|                                          | 10      | 0.37 ± 0.17 b  | 0.23 ± 0.21 b   | 0.38 ± 0.48 a   | 2.53 ± 1.54 a  |
|                                          | 50      | 0.75 ± 0.00 a  | 1.65 ± 0.05 a   | 0.89 ± 0.06 a   | 0.55 ± 0.02 b  |
|                                          | 100     | 0.74 ± 0.01 a  | 1.29 ± 0.13 a   | 0.87 ± 0.02 a   | 0.60 ± 0.04 b  |
|                                          | 200     | 0.69 ± 0.02 a  | 0.63 ± 0.19 b   | 0.79 ± 0.06 a   | 0.86 ± 0.12 b  |
| <i>Raphiolepis indica var. umbellata</i> | Control | 0.73 ± 0.02 a  | 2.12 ± 0.39 a   | 0.81 ± 0.05 a-c | 0.51 ± 0.04 a  |
|                                          | 10      | 0.73 ± 0.02 a  | 1.89 ± 0.42 a   | 0.96 ± 0.03 a   | 0.61 ± 0.09 a  |
|                                          | 50      | 0.75 ± 0.02 a  | 2.93 ± 0.81 a   | 0.88 ± 0.03 ab  | 0.49 ± 0.10 a  |
|                                          | 100     | 0.75 ± 0.01 a  | 2.61 ± 0.53 a   | 0.78 ± 0.02 bc  | 0.45 ± 0.04 a  |
|                                          | 200     | 0.73 ± 0.01 a  | 1.64 ± 0.52 a   | 0.67 ± 0.08 c   | 0.51 ± 0.06 a  |
| <i>Eriobotrya japonica</i>               | Control | 0.61 ± 0.03 b  | 0.18 ± 0.23 d   | 0.11 ± 0.35 b   | 1.10 ± 0.15 a  |
|                                          | 10      | 0.77 ± 0.00 a  | 2.33 ± 0.22 ab  | 1.05 ± 0.01 a   | 0.52 ± 0.01 c  |
|                                          | 50      | 0.76 ± 0.01 a  | 2.51 ± 0.56 a   | 0.88 ± 0.05 a   | 0.47 ± 0.05 c  |
|                                          | 100     | 0.73 ± 0.01 a  | 1.37 ± 0.41 bc  | 0.85 ± 0.08 a   | 0.64 ± 0.07 bc |
|                                          | 200     | 0.66 ± 0.02 b  | 0.56 ± 0.07 cd  | 0.73 ± 0.05 a   | 0.88 ± 0.05 ab |
| <i>Torreya nucifera</i>                  | Control | 0.60 ± 0.01 b  | 0.54 ± 0.05 c   | 0.73 ± 0.01 bc  | 1.01 ± 0.04 a  |
|                                          | 10      | 0.72 ± 0.03 a  | 1.90 ± 0.63 a-c | 0.89 ± 0.10 a   | 0.65 ± 0.20 b  |
|                                          | 50      | 0.76 ± 0.01 a  | 2.54 ± 0.66 a   | 0.84 ± 0.03 ab  | 0.47 ± 0.07 b  |
|                                          | 100     | 0.75 ± 0.00 a  | 2.26 ± 0.17 ab  | 0.70 ± 0.02 bc  | 0.42 ± 0.01 b  |
|                                          | 200     | 0.71 ± 0.01 a  | 0.89 ± 0.23 bc  | 0.63 ± 0.01 c   | 0.62 ± 0.06 b  |
| <i>Camellia japonica</i>                 | Control | 0.69 ± 0.01 b  | 1.08 ± 0.09 b   | 0.87 ± 0.03 a   | 0.73 ± 0.01 a  |
|                                          | 10      | 0.75 ± 0.01 a  | 2.19 ± 0.31 a   | 0.83 ± 0.01 ab  | 0.48 ± 0.03 b  |
|                                          | 50      | 0.75 ± 0.01 a  | 2.24 ± 0.45 a   | 0.76 ± 0.04 b   | 0.45 ± 0.03 b  |
|                                          | 100     | 0.73 ± 0.01 a  | 1.50 ± 0.42 ab  | 0.81 ± 0.02 ab  | 0.59 ± 0.06 b  |
|                                          | 200     | 0.70 ± 0.01 b  | 0.86 ± 0.18 b   | 0.85 ± 0.03 ab  | 0.77 ± 0.05 a  |
| <i>Ternstroemia gymnanthera</i>          | Control | 0.82 ± 0.01 a  | 4.42 ± 0.45 ab  | 0.81 ± 0.11 a   | 0.29 ± 0.05 a  |

|                            |         |               |                |                |                |
|----------------------------|---------|---------------|----------------|----------------|----------------|
|                            | 10      | 0.79 ± 0.03 a | 5.48 ± 0.77 a  | 0.94 ± 0.11 a  | 0.29 ± 0.05 a  |
|                            | 50      | 0.80 ± 0.01 a | 2.63 ± 0.43 c  | 0.98 ± 0.09 a  | 0.44 ± 0.08 a  |
|                            | 100     | 0.76 ± 0.03 a | 2.25 ± 0.27 c  | 0.94 ± 0.04 a  | 0.48 ± 0.05 a  |
|                            | 200     | 0.82 ± 0.01 a | 2.99 ± 0.17 bc | 0.81 ± 0.07 a  | 0.33 ± 0.04 a  |
| <i>Farfugium japonicum</i> | Control | 0.84 ± 0.00 a | 6.15 ± 0.32 b  | 0.79 ± 0.03 a  | 0.24 ± 0.00 b  |
|                            | 10      | 0.81 ± 0.01 b | 4.59 ± 0.82 b  | 0.75 ± 0.06 a  | 0.33 ± 0.01 a  |
|                            | 50      | 0.85 ± 0.00 a | 10.48 ± 1.05 a | 0.71 ± 0.03 a  | 0.18 ± 0.01 c  |
|                            | 100     | 0.85 ± 0.00 a | 10.84 ± 0.92 a | 0.71 ± 0.02 a  | 0.18 ± 0.01 c  |
|                            | 200     | 0.85 ± 0.00 a | 8.96 ± 1.00 a  | 0.74 ± 0.03 a  | 0.20 ± 0.01 c  |
| <i>Acorus gramineus</i>    | Control | 0.84 ± 0.00 a | 4.99 ± 0.41 a  | 0.78 ± 0.41 b  | 0.25 ± 0.01 a  |
|                            | 10      | 0.83 ± 0.01 a | 4.64 ± 0.06 a  | 4.64 ± 0.06 ab | 0.26 ± 0.02 a  |
|                            | 50      | 0.81 ± 0.02 a | 6.00 ± 0.89 a  | 6.00 ± 0.89 a  | 0.30 ± 0.07 a  |
|                            | 100     | 0.83 ± 0.01 a | 5.25 ± 0.37 a  | 5.25 ± 0.37 ab | 0.27 ± 0.03 a  |
|                            | 200     | 0.81 ± 0.01 a | 5.68 ± 0.30 a  | 0.92 ± 0.06 ab | 0.28 ± 0.02 a  |
| <i>Liriope muscari</i>     | Control | 0.83 ± 0.01 a | 3.94 ± 0.18 b  | 0.84 ± 0.06 a  | 0.30 ± 0.01 ab |
|                            | 10      | 0.81 ± 0.00 a | 5.15 ± 0.53 ab | 0.85 ± 0.02 a  | 0.29 ± 0.01 ab |
|                            | 50      | 0.82 ± 0.00 a | 6.67 ± 0.58 a  | 0.77 ± 0.04 a  | 0.25 ± 0.02 b  |
|                            | 100     | 0.80 ± 0.02 a | 5.75 ± 0.60 a  | 0.80 ± 0.05 a  | 0.27 ± 0.03 ab |
|                            | 200     | 0.81 ± 0.00 a | 5.44 ± 0.44 ab | 0.88 ± 0.02 a  | 0.31 ± 0.01 a  |

<sup>1</sup> Different letters indicate a significant difference using Duncan's multiple range test at  $P < 0.05$ . <sup>2</sup> Plants grown in a glass greenhouse.
